# Supplementary material
Source: PubMed Central journal article supplement (PMC2904831)
Supplement: NIHMS208927-supplement-01.pdf [file NIHMS208927-supplement-01.pdf]

## Supplementary Figure Legend

**Supplementary Figure 1.** Recognition of N-terminally modified pMART<sub>100-114</sub> peptides by CD4<sup>+</sup> T cells. The T cell clone D7-F6 was co-incubated overnight with HLA-DR1<sup>+</sup> 2048-EBV cells pre-pulsed with native or modified pMART-1 peptides (25 μM). GM-CSF secretion from T cells was measured by ELISA. Background GM-CSF secretion from T cells + APC + HA<sub>307-319</sub> control peptide was <0.02 ng/ml. Results are representative of four independent experiments with D7-F6 and the parent CD4<sup>+</sup> T cell line D7, showing that residues N-terminal to the P1 peptide-MHC anchor position (Tyr104) influence T cell recognition.

| Residues      | Sequence                               | DRB1*0101<br>IC50 (nM) | D7-F6 T cells                                                                         |
|---------------|----------------------------------------|------------------------|---------------------------------------------------------------------------------------|
| 100-114       | APPAYEKLP <sup>S</sup> AEQSPP          | 102                    |    |
| 100-114,A100I | <u>I</u> PPAYEKLP <sup>S</sup> AEQSPP  | 109                    |   |
| 100-114,P101A | <u>A</u> APAYEKLP <sup>S</sup> AEQSPP  | 199                    |  |
| 100-114,P102A | AP <u>A</u> AYEKLP <sup>S</sup> AEQSPP | 69                     |  |
| 100-114,A103I | APP <u>I</u> YEKLP <sup>S</sup> AEQSPP | 346                    |  |

0    600    1200  
GM-CSF (pg/ml)
